# Supplementary material
Source: PubMed Central journal article supplement (PMC9600600)
Supplement: NIHMS1680631-supplement-Supplementary_Material.pdf [file NIHMS1680631-supplement-Supplementary_Material.pdf]

## A Spline functions

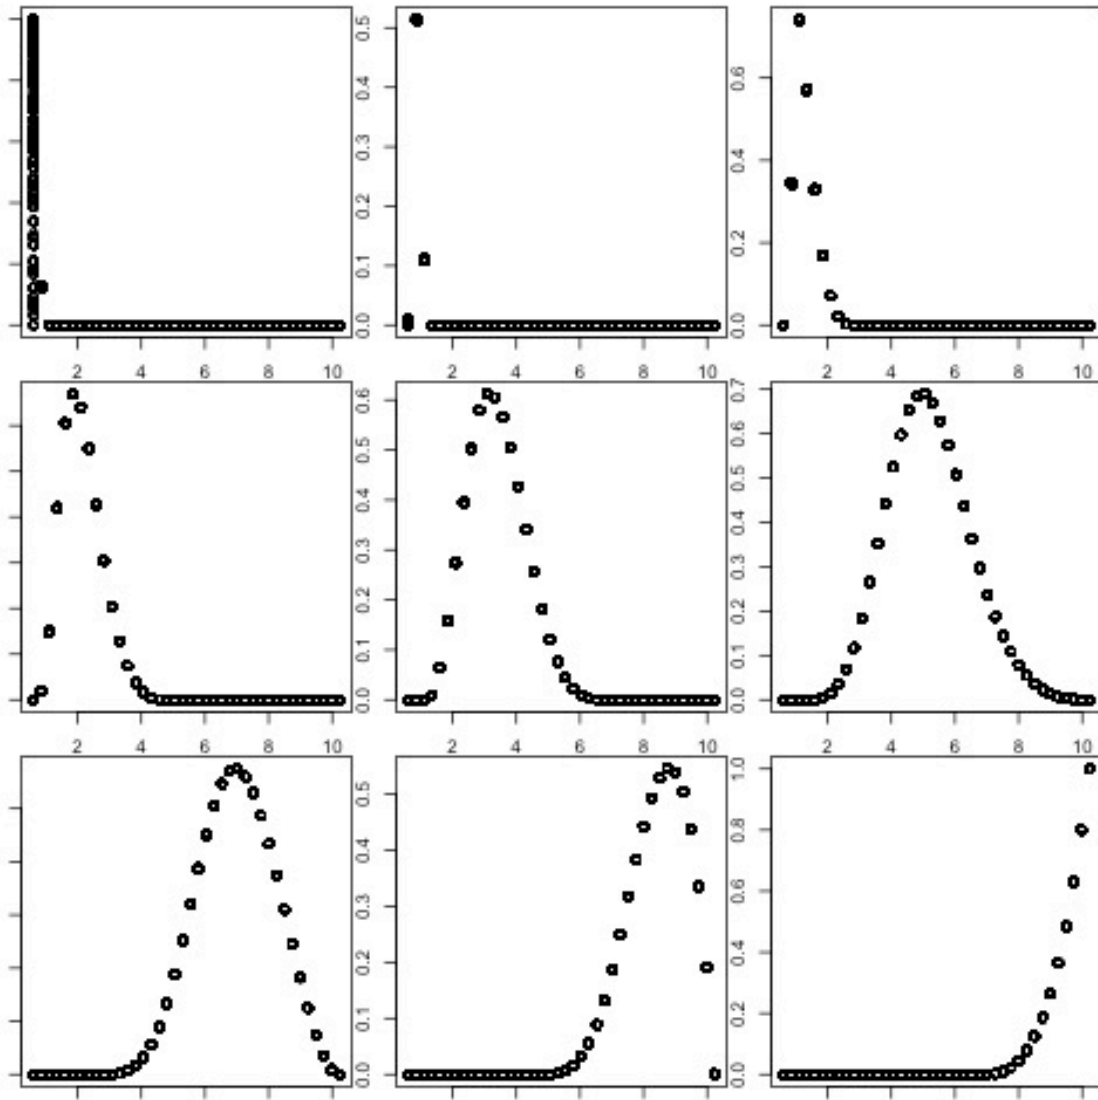

Figure A.1: Spline functions of time used as covariates in  $D_{ij}^*$  with profile-specific coefficients. The x-axis represents time in years.

## B Posterior computation

Supplemental materials for the posterior computation under marginal and joint profiling.

## B.1 Marginal profiling

The prior distributions are specified as:  $\beta \sim N(0, \Sigma_\beta)$ ,  $\alpha_l \sim N(0, \Sigma_\alpha)$ ,  $\sigma_l^2 \sim \text{Inverse-Gamma: IG}(a, b)$ ,  $\Sigma_r \sim \text{Inverse-Wishart: IW}(\nu_b, \Sigma_b)$  and  $\eta_l \sim N(b_l, B_l)$ , where we set the hyper-parameters equal to 1 and assume independence in the covariance matrix specification. The posterior updating follows the steps:

1. Update  $C_i$ : for  $i = 1, \dots, n$ , draw  $C_i$  from a multinomial distribution with probability

$$\Pr(C_i = l) = \frac{\pi_l(\mathbf{X}_{i0}, \eta_l) \prod_j f(Y_{ij} | \beta, \alpha_l, b_i, \sigma_l^2, D_i, D_i^*, D_i^{**})}{\sum_l \pi_l(\mathbf{X}_{i0}, \eta_l) \prod_j f(Y_{ij} | \beta, \alpha_l, b_i, \sigma_l^2, D_i, D_i^*, D_i^{**})}$$

2. Update  $\alpha_l$ : for  $l = 2, \dots, L$ , where  $\alpha_1 = 0$  for identification purpose,  $\pi(\alpha_l | -) = N(\mu_\alpha, V_\alpha)$ , where  $V_\alpha = (\Sigma_\alpha^{-1} + \sigma_l^{-2} D_l^{*'} D_l^*)^{-1}$ ,  $\mu_\alpha = V_\alpha \sigma_l^{-2} D_l^{*'} (X_l - D_l \beta - D_l^{**} b_l)$ . Here  $D_l, D_l^*, D_l^{**}, X_l, b_l$  are subsets of the design matrix and random effects for all  $i, j$  such that  $C_i = l$
3. Update  $\eta_l$ : for  $l = 2, \dots, L$ , let  $c_{il} = I(C_i = l)$ ,  $\pi(\eta_l) \sim N(m_l^*, S_l^*)$ , where  $S_l^* = (V^T \Omega_l V + B_l^{-1})^{-1}$ ,  $V$  is the design matrix with each row  $\mathbf{X}_{i0}^T$ ,  $\Omega_l = \text{diag}(w_{1l}, \dots, w_{nl})$ , and  $m_l^* = S_l^* (B_l^{-1} b_l + V^T m_l)$ , where  $m_l$  is a vector in  $R^n$ , and the  $i$ th component is  $m_l^{(i)} = c_{il} - 1/2 + w_{il} \{\log[\sum_{k \neq l} \exp(\mathbf{X}_{i0}^T \eta_k)]\}$ .
4. Update  $\beta \sim N(\mu_\beta, V_\beta)$ , where  $\mathbf{X}_{i0}^* = D_i^{**} \Sigma_r D_i^{**'} + \sigma_{C_i}^2 I_{T_i}$ ,  $V_\beta = (\Sigma_\beta^{-1} + \sum_i D_i' \mathbf{X}_{i0}^{*-1} D_i)^{-1}$ , and  $\mu_\beta = V_\beta \sum_i D_i' \mathbf{X}_{i0}^{*-1} (Y_i - D_i^* \alpha_{C_i})$ .
5. Update  $\sigma_l^2$ , for  $l = 1, \dots, L$  from  $IG(\sum_{i: C_i=l} T_i/2 + a, (Y_l - D_l \beta - D_l^* \alpha - D_l^{**} b_l)' (Y_l - D_l \beta - D_l^* \alpha - D_l^{**} b_l)/2 + b)$ .
6. Update  $\Sigma_r$  from  $IW(n + \nu_b, b'b + \Sigma_b)$ .
7. Update  $b_i$  from  $N(\mu_b, V_b)$ , here  $V_b = (\Sigma_r^{-1} + \sigma_{C_i}^{-2} D_i^{**'} D_i^{**})^{-1}$ , and  $\mu_b = V_b \sigma_{C_i}^{-2} D_i^{**'} (Y_i - D_i \beta - D_i^* \alpha_{C_i})$

After convergence, we impute missing data from the assumed model for  $Y$  since this step does not need to be included into the iterations.

## B.2 Joint profiling

The prior distributions are specified as  $\beta \sim N(0, \Sigma_\beta)$ ,  $\alpha_l \sim N(0, \Sigma_\alpha)$ ,  $\sigma_l^2 \sim \text{IG}(a, b)$ ,  $\Sigma_r \sim \text{IW}(\nu_b, \Sigma_b)$ ,  $\eta_l \sim N(b_l, B_l)$ ,  $\nu \sim N(0, \Sigma_\nu)$ ,  $\gamma_l \sim N(0, \Sigma_\gamma)$  and  $E \sim \text{IW}(\nu_e, \Sigma_e)$ , where we set the hyper-parameters equal to 1 and assume independence in the covariance matrix specification. The posterior computation is the following.

1. Update  $C_i$ : for  $i = 1, \dots, n$ , draw  $C_i$  from a multinomial distribution with probability

$$\Pr(C_i = l) = \frac{\pi_l(\mathbf{X}_{i0}, \eta_l) \prod_j p_{ij|C_i=l}^{R_{ij}} (1 - p_{ij|C_i=l})^{1-R_{ij}} f(Y_{ij} | \beta, \alpha_l, b_i, \sigma_l^2, D_i, D_i^*, D_i^{**})}{\sum_l \pi_l(\mathbf{X}_{i0}, \eta_l) \prod_j p_{ij|C_i=l}^{R_{ij}} (1 - p_{ij|C_i=l})^{1-R_{ij}} f(Y_{ij} | \beta, \alpha_l, b_i, \sigma_l^2, D_i, D_i^*, D_i^{**})}$$

2. Update  $\alpha_l$ : for  $l = 2, \dots, L$ , where  $\alpha_1 = 0$ ,  $\pi(\alpha_l | -) = N(\mu_\alpha, V_\alpha)$ , where  $V_\alpha = (\Sigma_\alpha^{-1} + \sigma_l^{-2} D_l^{*'} D_l^*)^{-1}$ ,  $\mu_\alpha = V_\alpha \sigma_l^{-2} D_l^{*'} (Y_l - D_l \beta - D_l^{**} b_l)$ .
3. Update  $\eta_l$ : for  $l = 2, \dots, L$ ,  $\pi(\eta_l) \sim N(m_l^*, S_l^*)$ , where  $S_l^* = (V^T \Omega_l V + B_l^{-1})^{-1}$ ,  $V$  is the design matrix with each row  $\mathbf{X}_{i0}^T$ ,  $\Omega_l = \text{diag}(w_{1l}, \dots, w_{nl})$ , and  $m_l^* = S_l^* (B_l^{-1} b_l + V^T m_l)$ , where  $m_l$  is a vector in  $R^n$ , and the  $i$ th component is

$$m_l^{(i)} = c_{il} - 1/2 + w_{il} \{ \log [ \sum_{k \neq l} \exp(\mathbf{X}_{i0}^T \eta_k) ] \}$$

4. Update  $\beta$ :  $\pi(\beta | -) = N(\mu_\beta, V_\beta)$ ,  $\mathbf{X}_{i0}^* = D_i^{**} \Sigma_r D_i^{**'} + \sigma_{C_i}^2 I_{T_i}$ ,  $V_\beta = (\Sigma_\beta^{-1} + \sum_i D_i' \mathbf{X}_{i0}^{*-1} D_i)^{-1}$ , and  $\mu_\beta = V_\beta \sum_i D_i' \mathbf{X}_{i0}^{*-1} (Y_i - D_i^* \alpha_{C_i})$ .
5. Update  $\sigma_l^2$ , for  $l = 1, \dots, L$ , from  $IG(\sum_{i: C_i=l} T_i/2 + 1, (Y_l - D_l \beta - D_l^* \alpha - D_l^{**} b)' (Y_l - D_l \beta - D_l^* \alpha - D_l^{**} b) / 2 + 1)$ .
6. Update  $\Sigma_r$  from  $IW(n + \nu_b, b'b + \Sigma_b)$ .
7. Update  $b_i$  from  $\pi(b_i | -) = N(\mu_b, V_b)$ , here  $V_b = (\Sigma_r^{-1} + \sigma_{C_i}^{-2} D_i^{**'} D_i^{**})^{-1}$ , and  $\mu_b = V_b \sigma_{C_i}^{-2} D_i^{**'} (Y_i - D_i \beta - D_i^* \alpha_{C_i})$ .

8. Update  $\nu$ :  $[v | -] \sim N(m_v^*, S_v^*)$ , where  $m_v^* = S_v^* (B^\top k_v)$ ,  $B = [ B_{11}^\top, \dots, B_{1T_1}^\top, B_{21}^\top, \dots, B_{nT_n}^\top ]^\top$  and  $k_v$  is a vector with length  $\sum_{i=1}^n T_i$ :

$$k_v = [ k_{11}^* - w_{11}^* ((B_{11}^*)^\top \gamma_{C_1} + (B_{11}^{**})^\top e_1), \dots, k_{nT_n}^* - w_{nT_n}^* ((B_{nT_n}^*)^\top \gamma_{C_n} + (B_{nT_n}^{**})^\top e_n) ]^\top$$

and  $S_v^* = (\Sigma_v^{-1} + B^\top \Omega_v B)^{-1}$ , where  $\Omega_v = \text{diag}(w_{11}^*, \dots, w_{1T_1}^*, w_{21}^*, \dots, w_{2T_2}^*, \dots, w_{n1}^*, \dots, w_{nT_n}^*)$ .

9. Update  $\gamma_l$ , for  $l = 2, \dots, k$ , from  $[\gamma_l | -] \sim N(m_{\gamma_l}^*, S_{\gamma_l}^*)$ , where  $m_{\gamma_l}^* = S_{\gamma_l}^* ((B^*)^\top k_{\gamma_l})$ ,  $B_l^* = [ (B_{11}^*)^\top I(C_1 = l), \dots, (B_{1T_1}^*)^\top I(C_1 = l), (B_{21}^*)^\top I(C_2 = l), \dots, B_{nT_n}^*)^\top I(C_n = l) ]^\top$  and  $k_{\gamma_l}$  is a vector with length  $\sum_{i: C_i=l} T_i$ :

$$k_{\gamma_l} = [ \{k_{11}^* - w_{11}^* (B_{11}^\top \nu + (B_{11}^{**})^\top e_1)\} I(C_1 = l), \dots, \{k_{nT_n}^* - w_{nT_n}^* (B_{nT_n}^\top \nu + (B_{nT_n}^{**})^\top e_n)\} I(C_n = l) ]$$

and  $S_{\gamma_l}^* = (\Sigma_{\gamma_l}^{-1} + (B^*)^\top \Omega_{\gamma_l} B^*)^{-1}$ , where  $\Omega_{\gamma_l} = \text{diag}(w_{11}^* I(C_1 = l), \dots, w_{1T_1}^* I(C_1 = l), w_{21}^* I(C_2 = l), \dots, w_{2T_2}^* I(C_2 = l), \dots, w_{n1}^* I(C_n = l), \dots, w_{nT_n}^* I(C_n = l))$ .

10. Update  $e_i$  from  $[e_i | -] \sim N(m_{e_i}^*, S_{e_i}^*)$ , where  $m_{e_i}^* = S_{e_i}^* ((B_i^{**})^\top k_{e_i})$ ,  $B_i^{**} = [ (B_{i1}^*)^\top, \dots, (B_{iT_i}^*)^\top ]^\top$  and  $k_{e_i}$  is a vector of  $R^{T_i}$  as the following:

$$k_{e_i} = [ k_{i1}^* - w_{i1}^* (B_{i1}^\top \nu + (B_{i1}^*)^\top \gamma_{C_1}), \dots, k_{iT_i}^* - w_{iT_i}^* (B_{iT_i}^\top \nu + (B_{iT_i}^*)^\top \gamma_{C_i}) ]^\top$$

and  $S_{e_i}^* = (E^{-1} + ((B_i^{**})^\top \Omega_{e_i} B_i^{**})^{-1}$ , where  $\Omega_{e_i} = \text{diag}(w_{i1}^*, \dots, w_{iT_i}^*)$ .

11. Update  $E$  from  $IW(n + \nu_e, \sum_{i=1}^n e_i e_i^\top + \Sigma_e)$ .

12. Impute missing data: draw  $Y_{ij}^*$  from  $f(Y_{ij} | \beta, \alpha_{C_i}, b_i, \sigma_{C_i}^2, D_i, D_{ij}^*, D_i^{**})$ .
